# Supplementary material
Source: HighWire-hosted journal article supplement (https://jnm.snmjournals.org/highwire/filestream/94400/field_highwire_adjunct_files/0/110239_Supplemental_Data.pdf)
Supplement: 110239_Supplemental_Data.pdf [file 110239_Supplemental_Data.pdf]

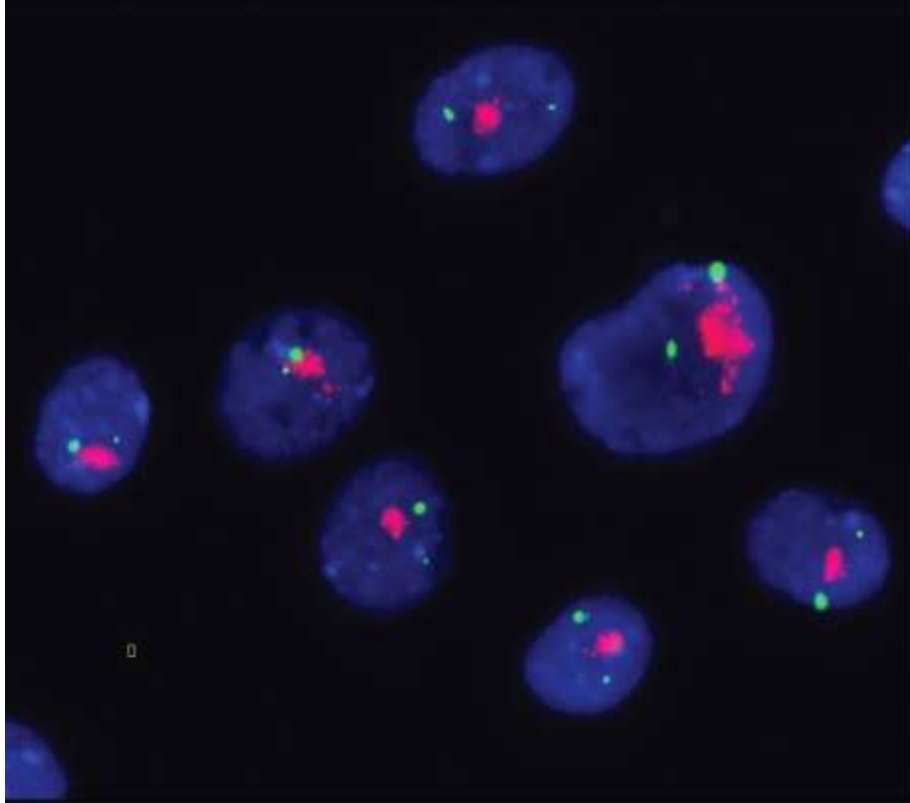

Gastric NCI-N87 HER2/Cep17

HER2 = red, Cep17 = green

**Supplemental Figure 1. NCI-N87 gastric cancer cell line is HER2 amplified.**

Fluorescence in-situ hybridization (FISH) analysis of NCI-N87 cell line confirms HER2 amplification, HER2/Cep17 >20. HER2=red Cep 17=green.

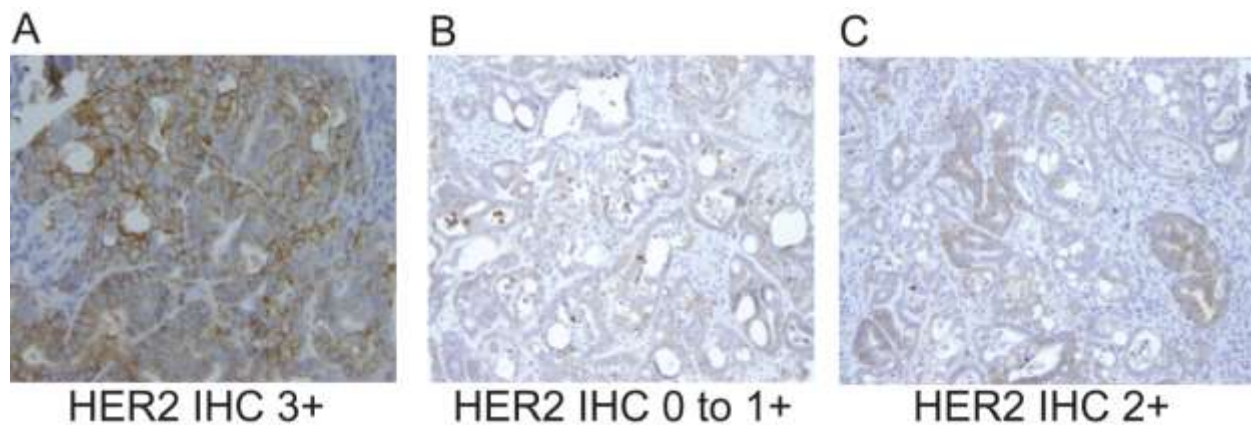

**Supplemental Figure 2. Single-dose afatinib inhibits downregulation of total HER2 in HER2-positive NCI-N87 xenografts.** Immunohistochemistry (IHC) analysis at baseline (panel A, untreated), 24h (panel B) and 48h (panel C) after a single dose of afatinib 25 mg/kg p.o.

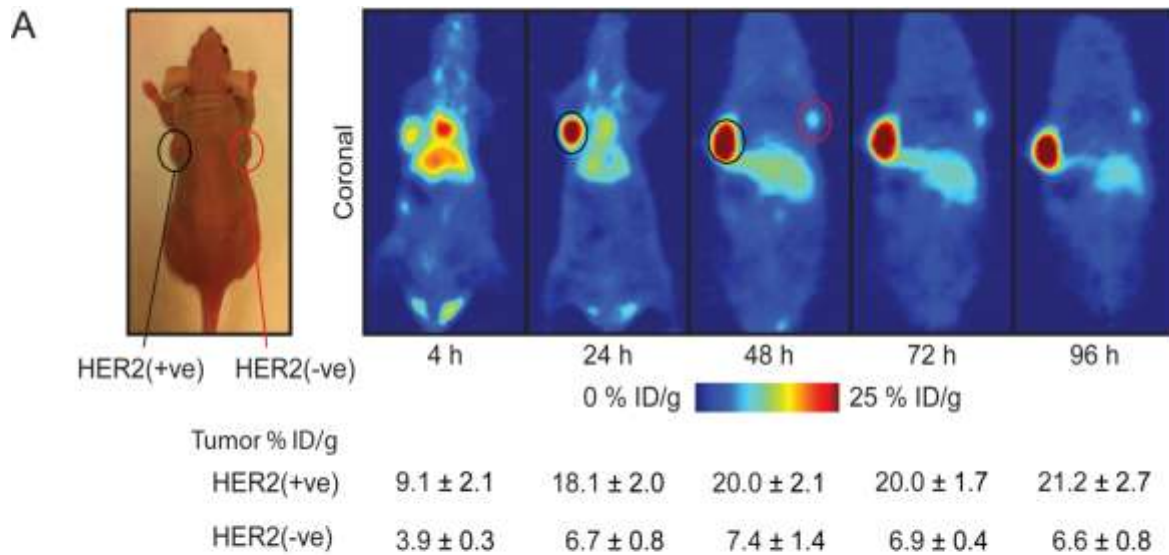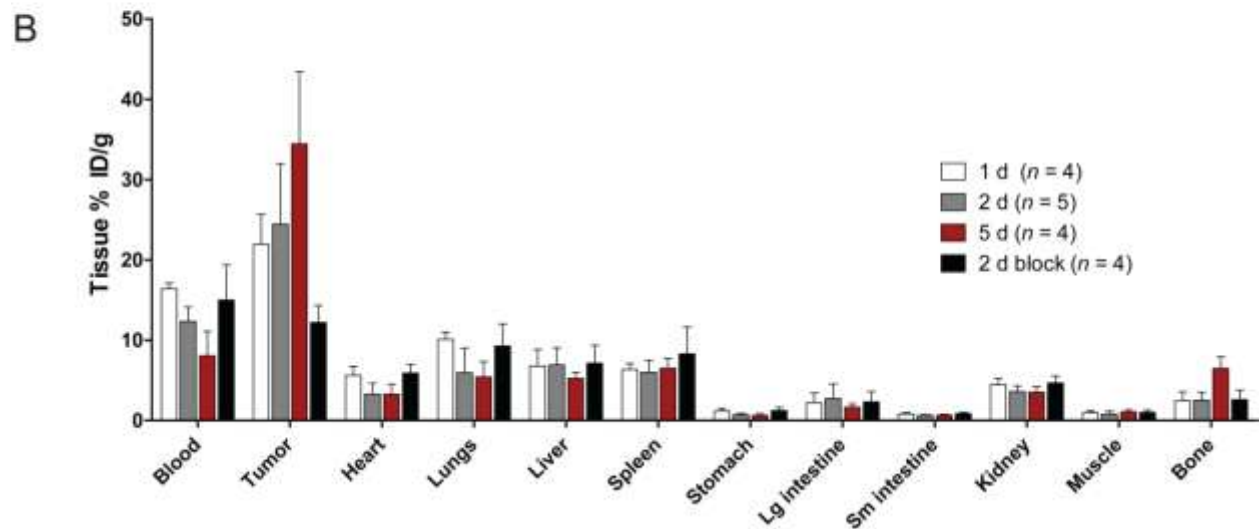

**Supplemental Figure 3.  $^{89}\text{Zr}$ -trastuzumab shows uptake in NCI-N87 tumors for up to 96 hours.** **A.** Coronal  $^{89}\text{Zr}$ -trastuzumab PET images of mice bearing s.c. NCI-N87 and MK-74 tumors imaged from 4h to 96 h p.i. The regions-of-interest (%ID/g) for  $^{89}\text{Zr}$ -trastuzumab indicated. **B.** Tissue biodistribution of  $^{89}\text{Zr}$ -trastuzumab in NCI-N87 xenografts untreated.

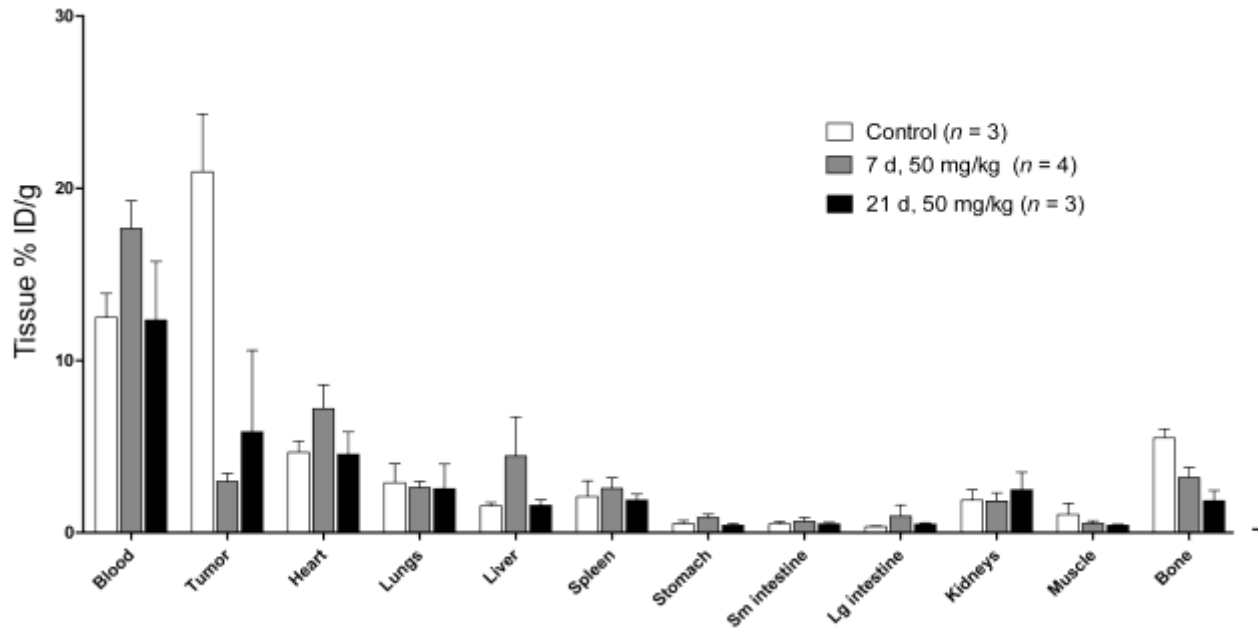

**Supplemental Figure 4. Tissue biodistribution of  $^{89}\text{Zr}$ -trastuzumab in NCI-N87 xenografts treated with afatinib.** Tissue biodistribution of  $^{89}\text{Zr}$ -trastuzumab in NCI-N87 xenografts at baseline, 7 and 21 days post afatinib 50mg/kg daily treatment.

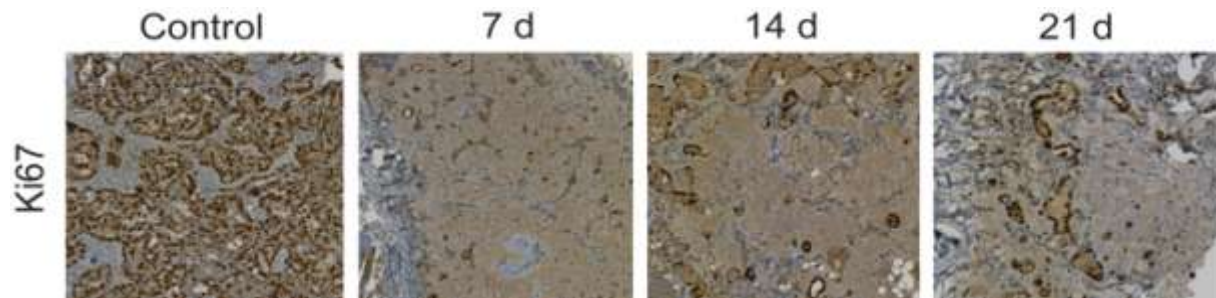

**Supplemental Figure 5. Ki67 staining of tumors harvested from NCI-N87 xenografts after afatinib therapy.** IHC staining of Ki67 in tumors treated with vehicle-only (control) or for 7, 14 and 21 days with afatinib. Positive staining (brown) for Ki67 is seen in the control tumors, which is abolished after 7 days of treatment, and is seen to slowly recover after 21 days. Bar = 100mm.

**Supplemental Table 1.** Full biodistribution of mice bearing NCI-N87 tumors\*

| Tissue           | Control<br>n=3 | 7 days<br>n=4 | 21 days<br>n=3 |
|------------------|----------------|---------------|----------------|
| Tumor            | 21.0 ± 3.4     | 3.0 ± 0.5     | 5.9 ± 4.7      |
| Blood            | 12.5 ± 1.4     | 17.7 ± 1.6    | 12.3 ± 3.4     |
| Heart            | 4.7 ± 0.7      | 7.2 ± 1.4     | 4.5 ± 1.3      |
| Lungs            | 2.9 ± 1.1      | 2.6 ± 0.4     | 2.5 ± 1.4      |
| Liver            | 1.6 ± 0.2      | 4.4 ± 2.3     | 1.6 ± 0.3      |
| Spleen           | 2.1 ± 0.9      | 2.6 ± 0.6     | 1.9 ± 0.3      |
| Stomach          | 0.5 ± 0.2      | 0.9 ± 0.2     | 0.4 ± 0.1      |
| Small intestines | 0.5 ± 0.1      | 0.7 ± 0.2     | 0.5 ± 0.1      |
| Large intestines | 0.3 ± 0.04     | 1.0 ± 0.6     | 0.5 ± 0.1      |
| Kidneys          | 1.9 ± 0.6      | 1.8 ± 0.5     | 2.5 ± 1.0      |
| Bone             | 5.5 ± 0.5      | 3.2 ± 0.6     | 1.8 ± 0.6      |
| Muscle           | 1.0 ± 0.7      | 0.5 ± 0.1     | 0.4 ± 0.1      |

\*Different cohorts of mice were treated with afatinib (50 mg/kg) p.o. daily for 1-3 weeks. A separate group of mice was dosed with the drug vehicle (0.9% saline).
